# Supplementary material for: Mortality and morbidity in patients with congenital heart disease hospitalised for viral pneumonia
Source: PubMed Central journal article supplement — Heart. 2020 Oct 27;107(13):1069–76. doi: 10.1136/heartjnl-2020-317706 (PMC8223651; doi:10.1136/heartjnl-2020-317706), 2020-10-27
Supplement: heartjnl-2020-317706supp001.pdf [file heartjnl-2020-317706supp001.pdf]

## Supplementary online only material

**Table A ICD-10 codes used for identification of viral pneumonia/severe lung involvement**

Any one of the following codes:

- J10.0 Influenza with pneumonia, virus identified
- J11.0 Influenza with pneumonia, virus not identified
- J12.0 Adenoviral pneumonia
- J12.1 Respiratory-Syncytial-Virus pneumonia
- J12.2 Parainfluenza virus pneumonia
- J12.3 Human Metapneumovirus pneumonia
- J12.8 Pneumonia caused by other viruses
- J12.9 Viral pneumonia causative agent not coded
- Combination of (J13-J18 or J44.0 or J44.1 or J80 or J81 or J96) **and** concomitant coding of (J09 or J10 or J11 or U69.20! or U69.21)
  - Details of the codes:
    - J13-J18: Pneumonia (bacterial or unclassified)
    - J44.0/J44.1 Chronic obstructive pulmonary disease with acute respiratory infection/exacerbation
    - J80 Adult respiratory distress syndrome
    - J81 Pulmonary oedema
    - J96 Respiratory failure, unclassified
    - J09 Influenza due to identified zoonotic or pandemic influenza virus
    - J10 Influenza due to identified seasonal influenza
    - J11 Influenza, virus not identified
    - U69.20! Influenza A/H1N1 pandemic 2009
    - U69.21! Influenza A/H5N1 epidemic

### ICD-10 codes used for endpoint definitions

- (1) All-cause mortality (inpatient or within 30 days post discharge)
- (2) Death / survived resuscitation/cardiac transplantation or mechanical cardiac support
  - Mechanical cardiac support: OPS 5-375, 5-376, 5-37b, 8-851, 8-852, 8-83a, 8-839.4, 8.839.a, 8.839.b
  - Resuscitation: OPS 8-77 or ICD-10 I49.0 or R09.2 or I46
- (3) Mechanical ventilation/extracorporeal lung support (ECLS)/death or resuscitation
  - Ventilation: OPS 8-70, 8-71, 5-311
  - ECLS: 8-852.0, 8-852.2

**Table B ICD-10 Codes used for identification and grouping of patients with congenital heart disease (CHD).****Simple CHD**

|                                                     |                                                                      |
|-----------------------------------------------------|----------------------------------------------------------------------|
| Isolated ventricular septal defect                  | Q21.0                                                                |
| Persistent arterial duct                            | Q25.0                                                                |
| Isolated congenital valve disease                   | Q23.0, Q23.1, Q22.4, Q22.8, Q22.9, Q23.2, Q23.3, Q22.1, Q22.2, Q22.3 |
| Other congenital malformation of the great arteries | Q25.8, Q25.9                                                         |

**Moderate complexity CHD**

|                                                  |                                  |
|--------------------------------------------------|----------------------------------|
| Tetralogy of Fallot                              | Q21.3, Q21.80, (Q22.0 and Q21.0) |
| Ebstein's anomaly                                | Q22.5                            |
| Aortic isthmus stenosis, interrupted aortic arch | Q25.1, Q25.2                     |
| Atrioventricular septal defect                   | Q21.2                            |
| Partial anomalous pulmonary venous connection    | Q26.3, Q26.4                     |

**Complex CHD**

|                                                                                                           |                                                                                                                                         |
|-----------------------------------------------------------------------------------------------------------|-----------------------------------------------------------------------------------------------------------------------------------------|
| Univentricular heart                                                                                      | Q20.1, Q20.2, Q20.4, Q22.6, Q23.4, (Q22.0 without Q21.0)                                                                                |
| Eisenmenger's syndrome                                                                                    | I27.8 and at least one further Q-Code with the exception of Q21.1 or Q21.88 and at least one further Q-Code with the exception of Q21.1 |
| Transposition of the great arteries (TGA)                                                                 | Q20.3, Q20.5                                                                                                                            |
| Other complex heart malformation, e.g. total anomalous pulmonary venous connection, common arterial trunk | Q20.0, Q26.2                                                                                                                            |

**Table C. Co-Variables and comorbidities considered:**

|                            |                         |
|----------------------------|-------------------------|
| Chromosomal anomalies      | Q90, Q91-Q94, Q95-Q99   |
| Cerebral infarction        | I63, I64, G45           |
| Myocardial infarction      | I21, I22                |
| Heart failure              | I50.0 or I50.1          |
| History of cancer          | any C-code              |
| Diabetes                   | E10-E14                 |
| Obesity                    | E66                     |
| Smoking history            | F17                     |
| Alcohol abuse              | F10                     |
| Severe renal dysfunction   | N18.4, N18.5            |
| Severe hepatic dysfunction | K72.1, K72.7            |
| Cardiac arrhythmias        | I47-I49                 |
| Arterial hypertension      | I10, I11, I12, I13, I15 |
| Chronic lung disease       | J40-J47                 |

**Drug therapy (Anatomical Therapeutic Chemical code):**Cardiac medication:

|                           |                                          |
|---------------------------|------------------------------------------|
| ACE-Inhibitors/ARBs       | C09                                      |
| Diuretics                 | C03                                      |
| Betablockers              | C07                                      |
| Cardiac glycosides        | C01AA                                    |
| Class III antiarrhythmics | C01BD                                    |
| Antiarrhythmics           | C01BA, C01BB, C01BC, C01BD, C01BG, C01AA |
| Calcium channel blockers  | C08                                      |

Antidepressants und antipsychotics N06A, N05AAnticonvulsives N03NSAIDs: C01EB16, M01AE01, C01EB16, M01AAntidiabetics: A10A, A10B, A10XAPulmonary hypertension drugs B01AC27, B01AC19, B01AC21, B01AC11, G04BE08, G04BE03, C02KXAnticoagulants (Vitamin K antagon.) B01AA04, B01AA03Novel oral anticoagulants B01AF, B01AE07Antiplatelet drugs B01AC06, B01AC04, B01AC34, B01AC36, B01AC56, B01AC86Immunosuppressants L04A, H02AB, H02B

**Table D.** Data on the distribution of virus diagnosis between the age groups and specific information about the virus types. In addition, selected information relevant to the SARS CoV-2 virus is provided from the literature.

| Distribution in current study  |           |            |          |                              |                                                                                         |                           |                   |
|--------------------------------|-----------|------------|----------|------------------------------|-----------------------------------------------------------------------------------------|---------------------------|-------------------|
| Virus Type                     | % overall | % children | % adults | Family                       | Characteristics                                                                         | Vaccine                   | Antiviral therapy |
| Influenza                      | 47.1%     | 14.2%      | 76.8%    | Orthomyxoviridae (RNA virus) | Seasonal and epi-/pandemics                                                             | +                         | +                 |
| Adenovirus                     | 2.7%      | 4.5%       | 1.1 %    | Adenoviridae (dsDNA virus)   | Respiratory infections / conjunctivitis / gastrointestinal infections<br>no seasonality | (+)<br>military personnel | (+)               |
| RSV                            | 28.7 %    | 55.5 %     | 4.5 %    | Pneumoviridae (RNA virus)    | Seasonal respiratory disease                                                            | +<br>monoclonal antibody  | (+)               |
| Human Metapneumovirus          | 1.3%      | 1.8%       | 0.8%     | Pneumoviridae (RNA virus)    | Respiratory infections                                                                  | -                         | -                 |
| Parainfluenza                  | 1.8%      | 1.3%       | 2.2%     | Paramyxovirus (RNA virus)    | Respiratory infections                                                                  | -                         | -                 |
| Published data (Lu et al 2020) |           |            |          |                              |                                                                                         |                           |                   |
| SARS CoV-2                     |           | ≈1 %       | ≈99%     | Coronaviridae (RNA virus)    | Respiratory infections - Pandemic                                                       | -                         | -                 |

RSV=respiratory-syncytial virus; DNA=deoxyribonucleic acid; RNA=ribonucleic acid; SARS CoV-2: severe acute respiratory syndrome coronavirus 2  
+ = available, - = absent, (+) = experimental, or approved for other indications

**Reference:** Lu X, Zhang L, Du H, Zhang J, Li YY, Qu J, Zhang W, Wang Y, Bao S, Li Y, Wu C, Liu H, Liu D, Shao J, Peng X, Yang Y, Liu Z, Xiang Y, Zhang F, Silva RM, Pinkerton KE, Shen K, Xiao H, Xu S, Wong GWK and Chinese Pediatric Novel Coronavirus Study T. SARS-CoV-2 Infection in Children. *The New Engl. J. Med.* 2020.

**Table E. Univariable predictors of outcome for the entire population on logistic regression analysis**

| Variable                              | Timeframe considered | All cause mortality |             |                  | Death/CPR/assist device/transplantation |             |                  | Mechanical ventilation/ECLS/CPR/death |             |                  |
|---------------------------------------|----------------------|---------------------|-------------|------------------|-----------------------------------------|-------------|------------------|---------------------------------------|-------------|------------------|
|                                       |                      | OR                  | 95%-CI      | p-Value          | OR                                      | 95%-CI      | p-Value          | OR                                    | 95%-CI      | p-Value          |
| Age (per year)                        | at admission         | 1.04                | (1.04-1.04) | <b>&lt;0.001</b> | 1.04                                    | (1.03-1.04) | <b>&lt;0.001</b> | 1.02                                  | (1.02-1.02) | <b>&lt;0.001</b> |
| Number of previous viral pneumonias   | at admission         |                     |             |                  |                                         |             |                  |                                       |             |                  |
| none                                  |                      |                     |             |                  |                                         |             |                  |                                       |             |                  |
| 1                                     |                      | 1.32                | (1.08-1.61) | <b>0.007</b>     | 1.61                                    | (1.35-1.93) | <b>&lt;0.001</b> | 1.75                                  | (1.52-2.02) | <b>&lt;0.001</b> |
| 2                                     |                      | 0.70                | (0.36-1.34) | 0.28             | 1.09                                    | (0.65-1.80) | 0.75             | 1.88                                  | (1.33-2.67) | <b>&lt;0.001</b> |
| Female gender                         |                      | 0.94                | (0.86-1.03) | 0.16             | 0.90                                    | (0.83-0.98) | <b>0.01</b>      | 0.94                                  | (0.88-1.00) | 0.05             |
| CHD Complexity                        |                      |                     |             |                  |                                         |             |                  |                                       |             |                  |
| no congenital heart disease           |                      |                     |             |                  |                                         |             |                  |                                       |             |                  |
| simple defect                         |                      | 0.22                | (0.13-0.35) | <b>&lt;0.001</b> | 0.40                                    | (0.28-0.56) | <b>&lt;0.001</b> | 0.83                                  | (0.68-1.01) | 0.06             |
| moderate complexity                   |                      | 0.33                | (0.14-0.75) | <b>0.008</b>     | 0.53                                    | (0.28-0.98) | <b>0.04</b>      | 1.31                                  | (0.92-1.87) | 0.14             |
| complex CHD                           |                      | 0.50                | (0.23-1.09) | 0.08             | 0.97                                    | (0.55-1.68) | 0.90             | 2.48                                  | (1.73-3.56) | <b>&lt;0.001</b> |
| Chromosomal anomalies                 | prior to admission   | 0.66                | (0.42-1.05) | 0.08             | 0.81                                    | (0.54-1.21) | 0.30             | 1.44                                  | (1.11-1.88) | <b>0.007</b>     |
| History of cerebral infarction        | prior to admission   | 3.16                | (2.75-3.62) | <b>&lt;0.001</b> | 2.88                                    | (2.52-3.28) | <b>&lt;0.001</b> | 2.14                                  | (1.90-2.41) | <b>&lt;0.001</b> |
| History of myocardial infarction      | prior to admission   | 2.44                | (1.98-3.00) | <b>&lt;0.001</b> | 2.49                                    | (2.05-3.03) | <b>&lt;0.001</b> | 2.22                                  | (1.87-2.63) | <b>&lt;0.001</b> |
| Diagnosis of heart failure            | prior to admission   | 2.86                | (2.40-3.40) | <b>&lt;0.001</b> | 2.68                                    | (2.27-3.17) | <b>&lt;0.001</b> | 2.25                                  | (1.94-2.61) | <b>&lt;0.001</b> |
| History of cancer                     | prior to admission   | 4.18                | (3.80-4.59) | <b>&lt;0.001</b> | 3.66                                    | (3.35-4.00) | <b>&lt;0.001</b> | 2.53                                  | (2.34-2.73) | <b>&lt;0.001</b> |
| Immune disease                        | prior to admission   | 1.32                | (1.08-1.62) | <b>0.007</b>     | 1.31                                    | (1.08-1.59) | <b>0.006</b>     | 1.22                                  | (1.04-1.43) | <b>0.01</b>      |
| History of diabetes                   | prior to admission   | 3.00                | (2.72-3.31) | <b>&lt;0.001</b> | 2.97                                    | (2.71-3.26) | <b>&lt;0.001</b> | 2.54                                  | (2.35-2.74) | <b>&lt;0.001</b> |
| Obesity                               | prior to admission   | 2.05                | (1.83-2.29) | <b>&lt;0.001</b> | 2.19                                    | (1.98-2.43) | <b>&lt;0.001</b> | 2.25                                  | (2.06-2.45) | <b>&lt;0.001</b> |
| Smoking history                       | prior to admission   | 2.11                | (1.83-2.44) | <b>&lt;0.001</b> | 2.27                                    | (1.99-2.59) | <b>&lt;0.001</b> | 2.78                                  | (2.49-3.10) | <b>&lt;0.001</b> |
| History of alcohol abuse              | prior to admission   | 2.69                | (2.23-3.26) | <b>&lt;0.001</b> | 2.84                                    | (2.38-3.39) | <b>&lt;0.001</b> | 2.88                                  | (2.47-3.37) | <b>&lt;0.001</b> |
| Severe renal dysfunction              | prior to admission   | 2.39                | (1.83-3.11) | <b>&lt;0.001</b> | 2.46                                    | (1.92-3.15) | <b>&lt;0.001</b> | 2.47                                  | (1.99-3.06) | <b>&lt;0.001</b> |
| Severe hepatic disease                | prior to admission   | ---                 | ---         | ---              | 1.71                                    | (0.35-8.40) | 0.51             | 1.48                                  | (0.37-5.87) | 0.58             |
| History of cardiac arrhythmias        | prior to admission   | 2.84                | (2.56-3.15) | <b>&lt;0.001</b> | 2.65                                    | (2.40-2.93) | <b>&lt;0.001</b> | 2.13                                  | (1.96-2.32) | <b>&lt;0.001</b> |
| Arterial hypertension                 | prior to admission   | 5.11                | (4.64-5.62) | <b>&lt;0.001</b> | 4.56                                    | (4.18-4.98) | <b>&lt;0.001</b> | 3.25                                  | (3.03-3.47) | <b>&lt;0.001</b> |
| Chronic lung disease                  | prior to admission   | 1.28                | (1.16-1.40) | <b>&lt;0.001</b> | 1.31                                    | (1.20-1.43) | <b>&lt;0.001</b> | 1.28                                  | (1.20-1.37) | <b>&lt;0.001</b> |
| Documented vaccination                |                      |                     |             |                  |                                         |             |                  |                                       |             |                  |
| Influenza                             | 1 year prior         | 2.34                | (2.11-2.59) | <b>&lt;0.001</b> | 2.22                                    | (2.01-2.44) | <b>&lt;0.001</b> | 1.98                                  | (1.83-2.15) | <b>&lt;0.001</b> |
| Pneumococcal disease                  | 5 years prior        | 1.85                | (1.60-2.15) | <b>&lt;0.001</b> | 1.91                                    | (1.66-2.19) | <b>&lt;0.001</b> | 1.81                                  | (1.61-2.03) | <b>&lt;0.001</b> |
| Prescription medication               |                      |                     |             |                  |                                         |             |                  |                                       |             |                  |
| Cardiac medication                    | prior to admission   | 6.54                | (5.89-7.26) | <b>&lt;0.001</b> | 5.65                                    | (5.14-6.21) | <b>&lt;0.001</b> | 3.65                                  | (3.41-3.91) | <b>&lt;0.001</b> |
| Antidepressant or antipsychotic drugs | prior to admission   | 3.25                | (2.94-3.59) | <b>&lt;0.001</b> | 2.99                                    | (2.72-3.29) | <b>&lt;0.001</b> | 2.43                                  | (2.24-2.63) | <b>&lt;0.001</b> |
| Anticonvulsives                       | prior to admission   | 2.26                | (1.99-2.57) | <b>&lt;0.001</b> | 2.31                                    | (2.05-2.60) | <b>&lt;0.001</b> | 2.25                                  | (2.04-2.49) | <b>&lt;0.001</b> |
| NSAIDs                                | prior to admission   | 0.77                | (0.70-0.85) | <b>&lt;0.001</b> | 0.77                                    | (0.70-0.84) | <b>&lt;0.001</b> | 0.78                                  | (0.73-0.84) | <b>&lt;0.001</b> |
| Antidiabetics                         | prior to admission   | 2.64                | (2.35-2.95) | <b>&lt;0.001</b> | 2.70                                    | (2.42-3.00) | <b>&lt;0.001</b> | 2.51                                  | (2.29-2.75) | <b>&lt;0.001</b> |
| Pulmonary hypertension drugs          | prior to admission   | 2.05                | (1.04-4.03) | <b>0.04</b>      | 1.93                                    | (1.01-3.70) | <b>0.05</b>      | 2.46                                  | (1.45-4.16) | <b>0.01</b>      |
| Anticoagulation Vitamin K antagonists | prior to admission   | 2.43                | (2.09-2.82) | <b>&lt;0.001</b> | 2.39                                    | (2.07-2.76) | <b>&lt;0.001</b> | 2.08                                  | (1.84-2.35) | <b>&lt;0.001</b> |
| Novel oral anticoagulants             | prior to admission   | 3.11                | (2.67-3.61) | <b>&lt;0.001</b> | 2.80                                    | (2.41-3.24) | <b>&lt;0.001</b> | 2.35                                  | (2.06-2.67) | <b>&lt;0.001</b> |
| Antiplatelet drugs                    | prior to admission   | 3.02                | (2.68-3.39) | <b>&lt;0.001</b> | 2.84                                    | (2.54-3.17) | <b>&lt;0.001</b> | 2.22                                  | (2.02-2.45) | <b>&lt;0.001</b> |
| Immunosuppressant medication          | prior to admission   | 1.59                | (1.45-1.76) | <b>&lt;0.001</b> | 1.46                                    | (1.33-1.60) | <b>&lt;0.001</b> | 1.36                                  | (1.27-1.47) | <b>&lt;0.001</b> |

Results of the univariable logistic regression analysis for the entire study population, assessing associations between patient demographics, congenital diagnosis and complexity of cardiac defect, associated cardiac and extracardiac conditions as well as vaccination and medication use and death or adverse clinical outcome. Significant values are in bold. CHD=congenital heart disease, CPR=cardio-pulmonary resuscitation, ECLS=extracorporeal lung support, MCS=mechanical cardiac support, NSAIDs= Non-steroidal anti-inflammatory drugs.

**Table F. Univariable predictors of outcome for the congenital heart disease group on logistic regression analysis**

| Variable                              | Timeframe considered | All cause mortality |               |                  | Death/CPR/assist device/transplantation |              |                  | Mechanical ventilation/ECLS/ |              |                  |
|---------------------------------------|----------------------|---------------------|---------------|------------------|-----------------------------------------|--------------|------------------|------------------------------|--------------|------------------|
|                                       |                      | OR                  | 95%-CI        | p-Value          | OR                                      | 95%-CI       | p-Value          | OR                           | 95%-CI       | p-Value          |
| Age (per year)                        | at admission         | 1.03                | (1.02-1.05)   | <b>&lt;0.001</b> | 1.02                                    | (1.01-1.03)  | <b>&lt;0.001</b> | 1.01                         | (1.00-1.02)  | 0.05             |
| Number of previous viral pneumonias   | at admission         |                     |               |                  |                                         |              |                  |                              |              |                  |
| none                                  |                      | reference           |               |                  | reference                               |              |                  | reference                    |              |                  |
| 1                                     |                      | 1.57                | (0.52-4.68)   | 0.42             | 1.56                                    | (0.71-3.46)  | 0.27             | 1.41                         | (0.86-2.30)  | 0.17             |
| 2                                     |                      | 1.38                | (0.17-10.95)  | 0.76             | 2.48                                    | (0.78-7.83)  | 0.12             | 2.83                         | (1.31-6.14)  | <b>0.008</b>     |
| Female gender                         |                      | 0.95                | (0.45-1.99)   | 0.88             | 0.68                                    | (0.39-1.17)  | 0.16             | 0.86                         | (0.63-1.18)  | 0.36             |
| CHD Complexity                        |                      |                     |               |                  |                                         |              |                  |                              |              |                  |
| simple defect                         |                      | reference           |               |                  | reference                               |              |                  | reference                    |              |                  |
| moderate complexity                   |                      | 1.51                | (0.58-3.96)   | 0.40             | 1.32                                    | (0.64-2.69)  | 0.45             | 1.58                         | (1.05-2.39)  | <b>0.03</b>      |
| complex CHD                           |                      | 2.28                | (0.90-5.77)   | 0.08             | 2.39                                    | (1.23-4.65)  | <b>0.01</b>      | 3.00                         | (1.97-4.56)  | <b>&lt;0.001</b> |
| Chromosomal anomalies                 | prior to admission   | 1.77                | (0.73-4.31)   | 0.21             | 1.62                                    | (0.84-3.16)  | 0.15             | 1.63                         | (1.08-2.46)  | <b>0.02</b>      |
| History of cerebral infarction        | prior to admission   | 6.75                | (1.28-35.54)  | <b>0.02</b>      | 3.14                                    | (0.62-15.79) | 0.17             | 1.79                         | (0.51-6.33)  | 0.37             |
| History of myocardial infarction      | prior to admission   | -                   | -             | -                | -                                       | -            | -                | 2.19                         | (0.16-29.27) | 0.56             |
| Diagnosis of heart failure            | prior to admission   | 4.45                | (1.19-16.61)  | <b>0.03</b>      | 2.87                                    | (0.91-9.07)  | <b>0.07</b>      | 1.25                         | (0.50-3.11)  | 0.63             |
| History of cancer                     | prior to admission   | 7.59                | (2.95-19.51)  | <b>&lt;0.001</b> | 3.75                                    | (1.59-8.89)  | <b>0.003</b>     | 2.09                         | (1.07-4.08)  | <b>0.03</b>      |
| Immune disease                        | prior to admission   | 1.41                | (0.32-6.30)   | 0.65             | 0.65                                    | (0.15-2.82)  | 0.57             | 0.88                         | (0.42-1.86)  | 0.74             |
| History of diabetes                   | prior to admission   | 1.85                | (0.23-14.96)  | 0.57             | 0.87                                    | (0.11-6.88)  | 0.90             | 0.97                         | (0.31-3.06)  | 0.96             |
| Obesity                               | prior to admission   | 2.64                | (0.57-12.20)  | 0.21             | 3.58                                    | (1.24-10.29) | <b>0.02</b>      | 2.03                         | (0.90-4.62)  | 0.09             |
| Smoking history                       | prior to admission   | 3.93                | (0.43-35.50)  | 0.22             | 7.38                                    | (1.64-33.17) | <b>0.009</b>     | 2.61                         | (0.67-10.11) | 0.17             |
| History of alcohol abuse              | prior to admission   | 22.04               | (2.95-164.56) | <b>0.003</b>     | 10.16                                   | (1.44-71.78) | <b>0.02</b>      | 10.43                        | (1.54-70.62) | <b>0.02</b>      |
| Severe renal dysfunction              | prior to admission   | 17.14               | (2.53-116.30) | <b>0.004</b>     | 7.93                                    | (1.23-51.14) | <b>0.03</b>      | 10.95                        | (1.83-65.40) | <b>0.009</b>     |
| History of arrhythmia                 | prior to admission   | 3.63                | (1.29-10.25)  | <b>0.02</b>      | 1.58                                    | (0.59-4.25)  | 0.36             | 1.11                         | (0.57-2.17)  | 0.75             |
| Arterial hypertension                 | prior to admission   | 4.44                | (1.68-11.75)  | <b>0.003</b>     | 2.71                                    | (1.18-6.24)  | <b>0.02</b>      | 1.67                         | (0.91-3.05)  | 0.10             |
| Chronic lung disease                  | prior to admission   | 0.95                | (0.40-2.28)   | 0.91             | 0.81                                    | (0.43-1.55)  | 0.53             | 0.64                         | (0.43-0.94)  | <b>0.02</b>      |
| Documented vaccination                |                      |                     |               |                  |                                         |              |                  |                              |              |                  |
| Influenza                             | 1 year prior         | 3.05                | (1.29-7.20)   | <b>0.011</b>     | 1.24                                    | (0.56-2.73)  | 0.60             | 1.30                         | (0.82-2.08)  | 0.27             |
| Pneumococcal disease                  | 5 years prior        | 3.73                | (0.99-14.00)  | 0.05             | 2.44                                    | (0.77-7.70)  | 0.13             | 1.56                         | (0.67-3.63)  | 0.30             |
| Prescription medication               |                      |                     |               |                  |                                         |              |                  |                              |              |                  |
| Cardiac medication                    | prior to admission   | 6.68                | (3.12-14.27)  | <b>&lt;0.001</b> | 3.51                                    | (1.96-6.29)  | <b>&lt;0.001</b> | 2.37                         | (1.60-3.53)  | <b>&lt;0.001</b> |
| Antidepressant or antipsychotic drugs | prior to admission   | 4.00                | (0.83-19.37)  | 0.09             | 1.86                                    | (0.40-8.67)  | 0.43             | 1.67                         | (0.60-4.64)  | 0.33             |
| Anticonvulsives                       | prior to admission   | 2.34                | (0.84-6.50)   | 0.10             | 1.45                                    | (0.62-3.39)  | 0.40             | 2.49                         | (1.51-4.09)  | <b>&lt;0.001</b> |
| NSAIDs                                | prior to admission   | 0.65                | (0.29-1.45)   | 0.30             | 0.49                                    | (0.27-0.89)  | <b>0.02</b>      | 0.48                         | (0.34-0.68)  | <b>&lt;0.001</b> |
| Antidiabetics                         | prior to admission   | 4.37                | (0.47-40.41)  | 0.19             | 2.07                                    | (0.23-18.38) | 0.52             | 1.11                         | (0.21-5.81)  | 0.90             |
| Pulmonary hypertension drugs          | prior to admission   | 3.89                | (0.44-34.73)  | 0.22             | 1.85                                    | (0.21-15.93) | 0.58             | 1.68                         | (0.40-7.00)  | 0.48             |
| Anticoagulation Vitamin K antagonists | prior to admission   | 4.46                | (0.91-21.90)  | 0.07             | 2.07                                    | (0.44-9.80)  | 0.36             | 1.10                         | (0.34-3.56)  | 0.87             |
| Novel oral anticoagulants             | prior to admission   | 3.88                | (0.43-34.61)  | 0.23             | 1.84                                    | (0.21-15.82) | 0.58             | 2.53                         | (0.66-9.64)  | 0.18             |
| Antiplatelet drugs                    | prior to admission   | 8.29                | (2.43-28.37)  | <b>0.001</b>     | 4.99                                    | (1.65-15.07) | <b>0.004</b>     | 2.10                         | (0.83-5.29)  | 0.12             |
| Immunosuppressant medication          | prior to admission   | 1.51                | (0.69-3.31)   | 0.31             | 1.07                                    | (0.58-1.95)  | 0.83             | 0.78                         | (0.53-1.13)  | 0.18             |

Results of the univariable logistic regression analysis for the congenital heart disease (CHD) population, assessing associations between patient demographics, congenital diagnosis and complexity of cardiac defect, associated cardiac and extracardiac conditions as well as vaccination and medication use and death or adverse clinical outcome. Significant values are in bold. CHD=congenital heart disease, CPR=cardio-pulmonary resuscitation, ECLS=extracorporeal lung support, MCS=mechanical cardiac support, NSAIDs=Non-steroidal anti-inflammatory drugs.
